# Supplementary material for: The mechanism of Raf activation through dimerization
Source: Royal Society of Chemistry journal article supplement (doi:10.1039/d1sc03444h), 2021-01-01

**Table S1.** Summary of simulation systems.

| System |    | NtA   | $\alpha$ C-helix | A-loop    |               |
|--------|----|-------|------------------|-----------|---------------|
| BI     |    | pS446 | OUT              | Collapsed |               |
| BA     |    | pS446 | IN               | Extended  | -             |
| BI/BI  | BI | pS446 | OUT              | Collapsed | -             |
|        | BI | pS446 | OUT              | Collapsed | -             |
| BI/BA  | BI | pS446 | OUT              | Collapsed | -             |
|        | BA | pS446 | IN               | Extended  | pT599 + pS602 |
| BA/BA  | BA | pS446 | IN               | Extended  | pT599 + pS602 |
|        | BA | pS446 | IN               | Extended  | pT599 + pS602 |
| CI     |    | -     | OUT              | Collapsed | -             |
| CA     |    | -     | IN               | Extended  | -             |
| BI/CI  | BI | pS446 | OUT              | Collapsed | -             |
|        | CI | -     | OUT              | Collapsed | -             |
| BI/CA  | BI | pS446 | OUT              | Collapsed | -             |
|        | CA | -     | IN               | Extended  | pT491 + pS494 |

*B-Raf inactive (BI); B-Raf activate (BA); C-Raf inactive (CI); C-Raf active (CA).*

**Figure S1.** Raf kinase domain conformations. The structures were modeled based on the B-Raf crystal structures (left panel). The inactive Raf kinase domain (KD) has a “collapsed” A-loop and “OUT”  $\alpha$ C-helix (upper right panel). The active Raf kinase domain has an “extended” A-loop and “IN”  $\alpha$ C-helix (lower right panel). In the inactive conformation, the hydrophobic interactions between the A-loop and the hydrophobic surface in the N-lobe help to confine the “collapsed” A-loop.

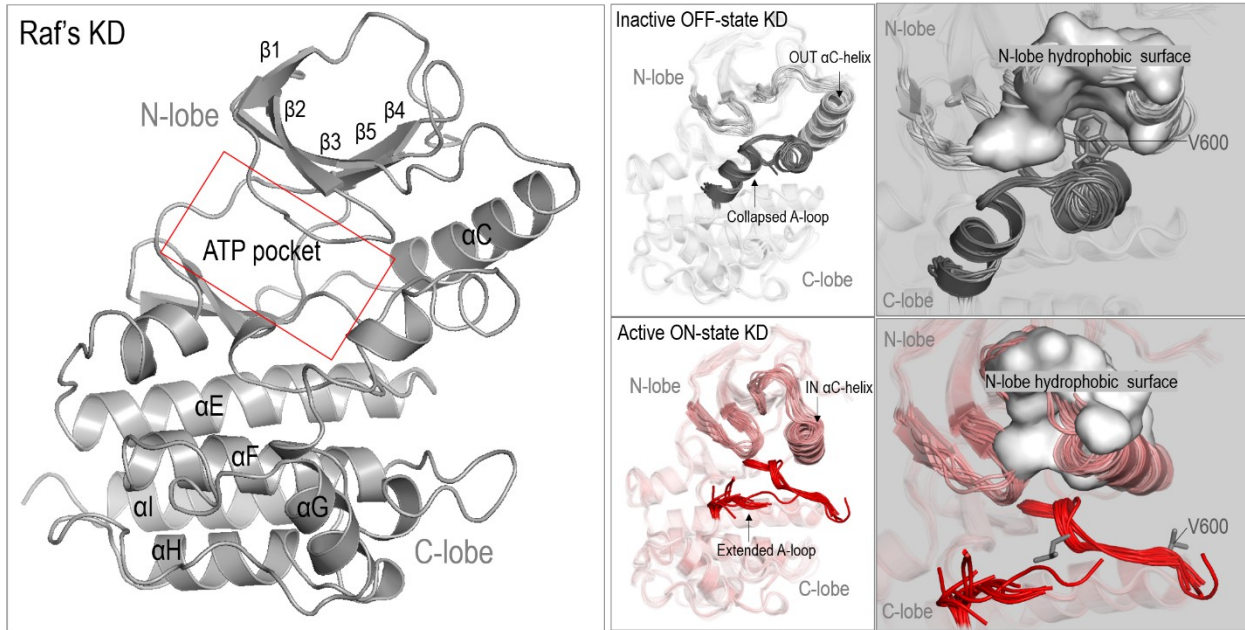

**Figure S2.** C $\alpha$  distances between the N-lobe residue K483 (K375 in C-Raf) and the C-lobe residues (residues 550-570 in  $\alpha$ E, 634-651 in  $\alpha$ F, 686-697 in  $\alpha$ H, 706-720 in  $\alpha$ I for B-Raf, residues 442-462 in  $\alpha$ E, 526-543 in  $\alpha$ F, 579-589 in  $\alpha$ H, 589-612 in  $\alpha$ I for C-Raf). BI refers to B-Raf with inactive conformation, CI refers to C-Raf with inactive conformation, where B and C stand for B-Raf and C-Raf respectively. BA, CA refer to the respective active conformations.

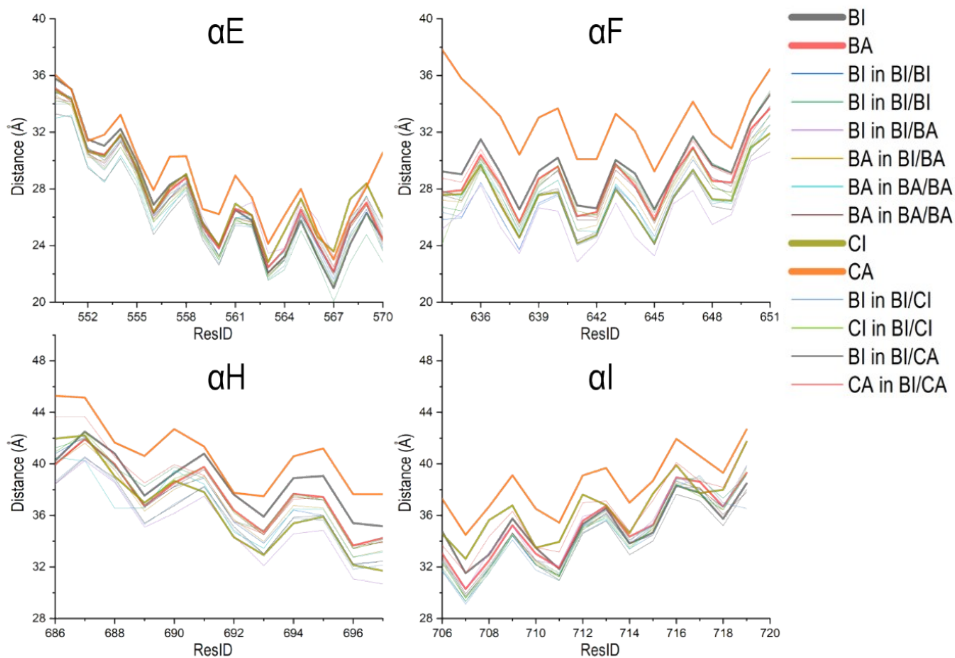

**Figure S3.**  $C\alpha$  distances for (A) V471-F583 interactions in C-spine and (B) H574-F595 interactions in R-spine. In the violin plots, the white dots denote the median, the thick black lines denote the data ranging from 25% to 75%, and the curve denote the probability density of the data. Staples in  $x$ -axis denote the dimeric configurations. BI refers to B-Raf with inactive conformation, CI refers to C-Raf with inactive conformation, where B and C stand for B-Raf and C-Raf respectively. BA, CA refer to the respective active conformations.

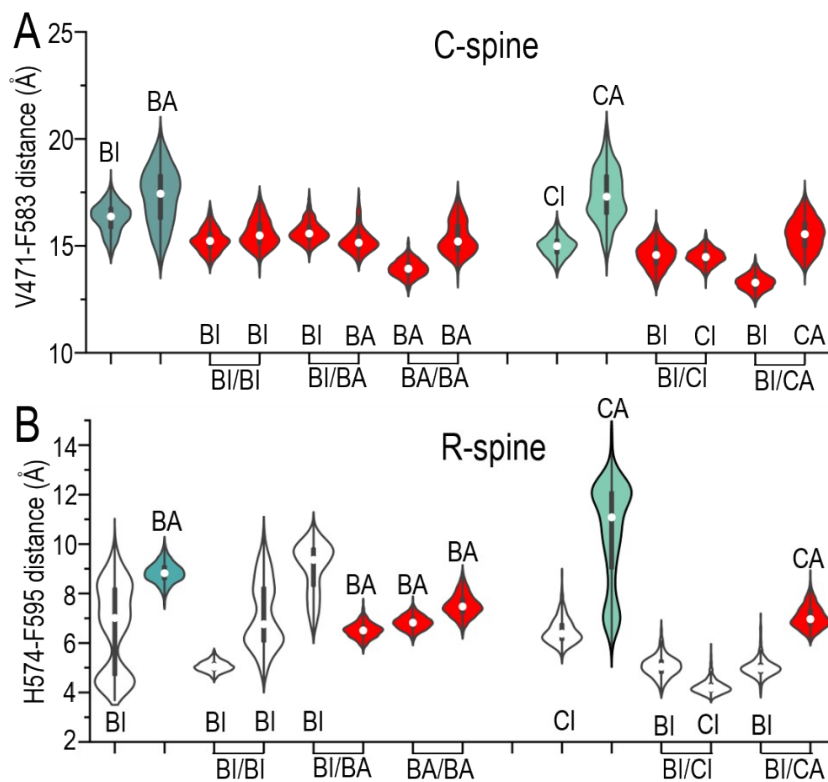

**Figure S4.** Snapshots showing the disruptions of V600/N-lobe interactions for BI in BI/BA and BI in BI/CI. BI refers to B-Raf with inactive conformation, CI refers to C-Raf with inactive conformation, where B and C stand for B-Raf and C-Raf respectively. BA, CA refer to the respective active conformations.

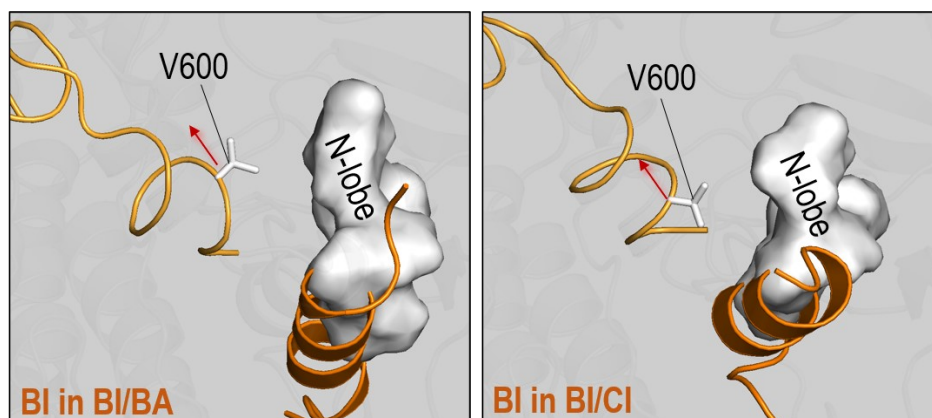

**Figure S5.** Distances between T599 and S602 in A-loop and D576 in HRD motif. (A) Averaged distances of the residue pairs for T599-D576 and S602-D576 in the dimerized inactive Raf kinases. The distance between S602 (S494 in C-Raf) in the A-loop and D576 (D468 in C-Raf) in the HRD motif is shorter than the distance of T599 (T491 in C-Raf) to D576. Error bars denote the standard deviation. (B) Time-dependent S602-D576 distances in B-Raf monomer (BI) and C-Raf monomer (CI). BI refers to B-Raf with inactive conformation, CI refers to C-Raf with inactive conformation, where B and C stand for B-Raf and C-Raf respectively. BA, CA refer to the respective active conformations.

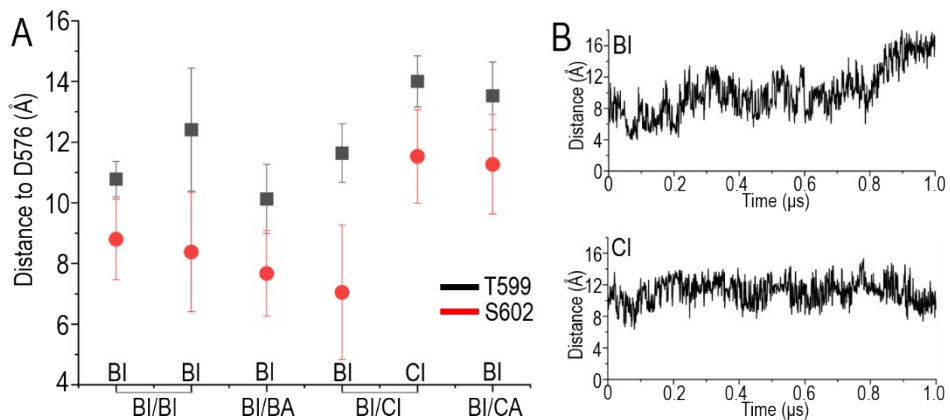

**Figure S6.** The disruptions of the intramolecular  $\pi$ - $\pi$  stacking and its replacements by the intermolecular  $\pi$ - $\pi$  stacking at the dimer interface. BI refers to B-Raf with inactive conformation, CI refers to C-Raf with inactive conformation, where B and C stand for B-Raf and C-Raf respectively. BA, CA refer to the respective active conformations.

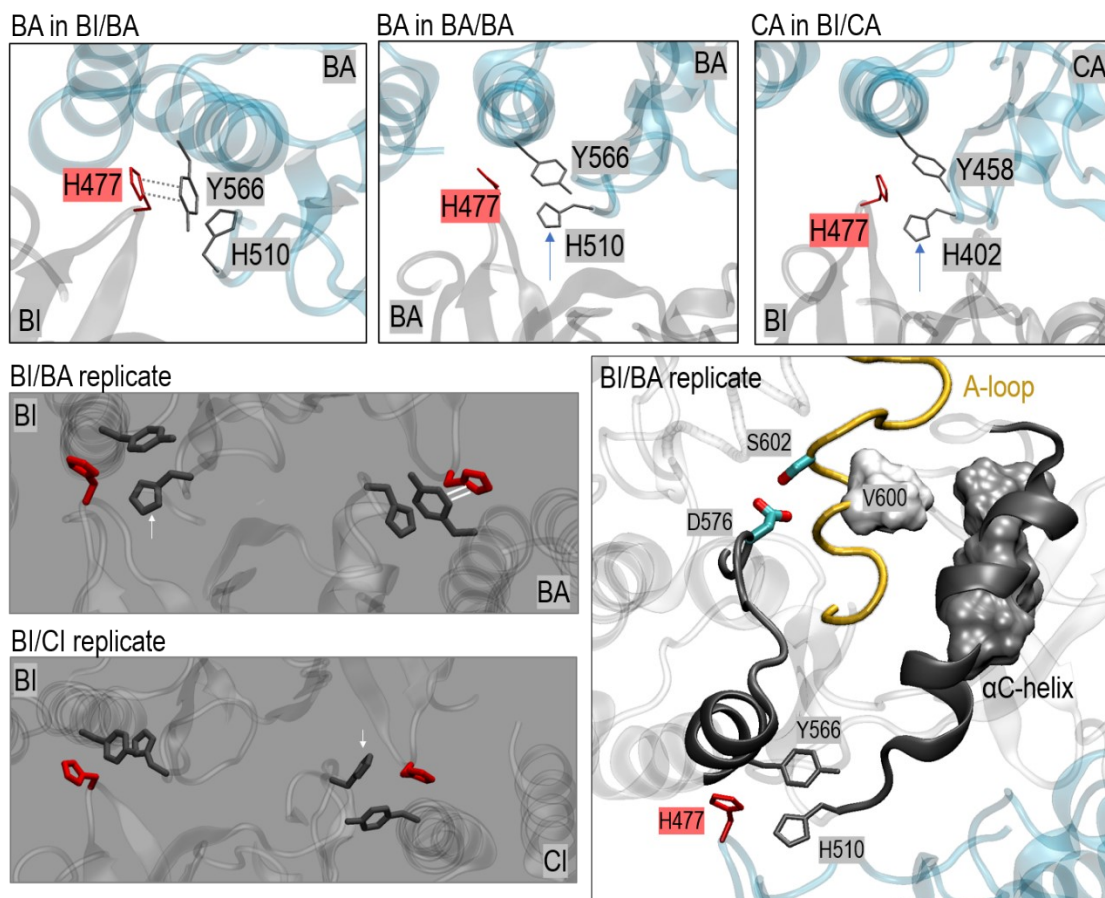

**Figure S7.** Modeling of Raf dimer with the NtB motif. The NtB-NtA motif orients towards and is sufficiently long to interact with another kinase domain in the dimer.

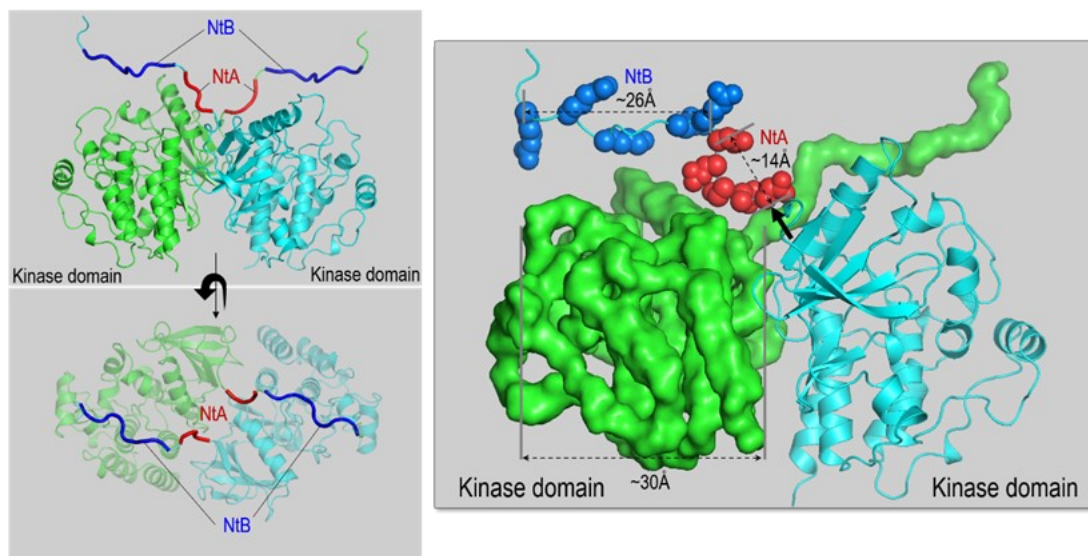



**Figure S8.** Y566-H510 intermolecular  $\pi$ - $\pi$  stacking in the Raf crystal and cryo-EM structures.

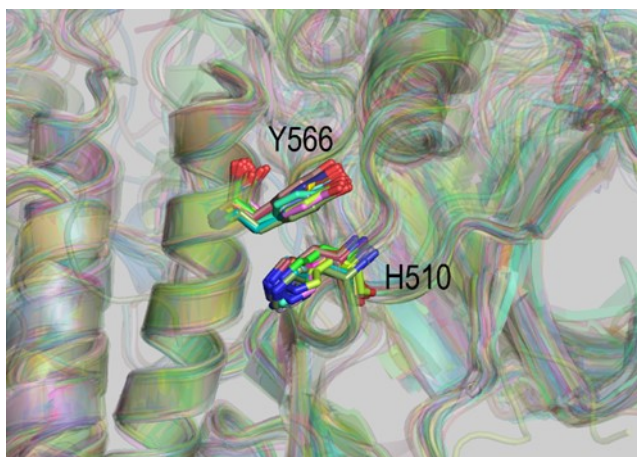

Supplement: d1sc03444h1.pdf [file d1sc03444h1.pdf]
